# Supplementary material for: Optical genome mapping of structural variants in Parkinson’s disease-related induced pluripotent stem cells
Source: PubMed Central journal article supplement (PMC11490025; doi:10.1186/s12864-024-10902-1), 2024-10-19
Supplement: 12864_2024_10902_MOESM2_ESM.pdf [file 12864_2024_10902_MOESM2_ESM.pdf]

**Supplementary Table 14.** Optical genome mapping and Nanopore long-read sequencing were compared by the number and length of identified structural variants (SV). Unless otherwise indicated, the DNA was derived from iPSC lines.

| N of INS                                                | Mean INS length ( $\pm$ SD) | N of DEL | Mean DEL length ( $\pm$ SD) | N of INV | Mean INV length ( $\pm$ SD)   | N of DUP | Mean DUP length ( $\pm$ SD)   | total SV |
|---------------------------------------------------------|-----------------------------|----------|-----------------------------|----------|-------------------------------|----------|-------------------------------|----------|
| <b>SFC831-03-05, Optical genome mapping</b>             |                             |          |                             |          |                               |          |                               |          |
| 139                                                     | 3227<br>( $\pm$ 6160)       | 91       | 5546<br>( $\pm$ 13550)      | 0        | NA                            | 4        | 555300<br>( $\pm$ 780273)     | 234      |
| <b>SFC831-03-05, Nanopore Sequencing</b>                |                             |          |                             |          |                               |          |                               |          |
| 3008                                                    | 2000<br>( $\pm$ 2721)       | 2066     | 653855<br>( $\pm$ 8342987)  | 50       | 31532040<br>( $\pm$ 36977885) | 17       | 23533631<br>( $\pm$ 42522638) | 5141     |
| <b>SFC827-03-02, Optical genome mapping</b>             |                             |          |                             |          |                               |          |                               |          |
| 128                                                     | 4970<br>( $\pm$ 12945)      | 90       | 50051<br>( $\pm$ 421729)    | 0        | NA                            | 5        | 1143750<br>( $\pm$ 1937702)   | 223      |
| <b>SFC827-03-02, Nanopore Sequencing</b>                |                             |          |                             |          |                               |          |                               |          |
| 997                                                     | 7393<br>( $\pm$ 5906)       | 65       | 31148<br>( $\pm$ 249497)    | 6        | 1968511<br>( $\pm$ 1547190)   | 8        | 1309265<br>( $\pm$ 1049652)   | 1076     |
| <b>iPS-L-3034, Optical genome mapping</b>               |                             |          |                             |          |                               |          |                               |          |
| 147                                                     | 2604<br>( $\pm$ 3829)       | 80       | 17342<br>( $\pm$ 67765)     | 1        | 15530                         | 1        | 192345                        | 229      |
| <b>L-3034 (Fibroblast line), Optical genome mapping</b> |                             |          |                             |          |                               |          |                               |          |
| 156                                                     | 3069<br>( $\pm$ 7912)       | 76       | 15415<br>( $\pm$ 64830)     | 0        | NA                            | 0        | NA                            | 232      |
| <b>iPS-L-3034, Nanopore Sequencing</b>                  |                             |          |                             |          |                               |          |                               |          |
| 1796                                                    | 1461<br>( $\pm$ 2536)       | 1565     | 466028<br>( $\pm$ 6086730)  | 26       | 37004333<br>( $\pm$ 48137264) | 3        | 9745447<br>( $\pm$ 16862528)  | 3390     |
| <b>iPS-L-3244, Optical genome mapping</b>               |                             |          |                             |          |                               |          |                               |          |
| 149                                                     | 3563<br>( $\pm$ 9415)       | 91       | 5937<br>( $\pm$ 11515)      | 0        | NA                            | 0        | NA                            | 240      |
| <b>iPS-L-3244, Nanopore Sequencing</b>                  |                             |          |                             |          |                               |          |                               |          |
| 2610                                                    | 2855<br>( $\pm$ 4597)       | 1780     | 94198<br>( $\pm$ 2820108)   | 15       | 35708685<br>( $\pm$ 51677059) | 3        | 16188231<br>( $\pm$ 28020535) | 4408     |
| <b>iPS-L-10312, Optical genome mapping</b>              |                             |          |                             |          |                               |          |                               |          |
| 143                                                     | 4017<br>( $\pm$ 11004)      | 95       | 5745<br>( $\pm$ 12074)      | 0        | NA                            | 0        | NA                            | 238      |
| <b>iPS-L-10312, Nanopore Sequencing</b>                 |                             |          |                             |          |                               |          |                               |          |
| 3063                                                    | 2772<br>( $\pm$ 3355)       | 1852     | 368102<br>( $\pm$ 5018483)  | 46       | 40761950<br>( $\pm$ 46692210) | 13       | 20188411<br>( $\pm$ 30043006) | 4974     |

N = Number of individual SV types; INS = Insertion; DEL = Deletion; INV = Inversion; DUP = Duplication  
The mean length of the SV types and the corresponding SD are displayed in bp.
